# Supplementary material for: Biorefinery of turmeric (Curcuma longa L.) using non-thermal and clean emerging technologies: an update on the curcumin recovery step
Source: Royal Society of Chemistry journal article supplement (doi:10.1039/c9ra08265d), 2019-12-23
Supplement: c9ra08265d1.pdf [file c9ra08265d1.pdf]

## Supplementary Material: Neves, Strieder, Vardanega, Silva and Meireles

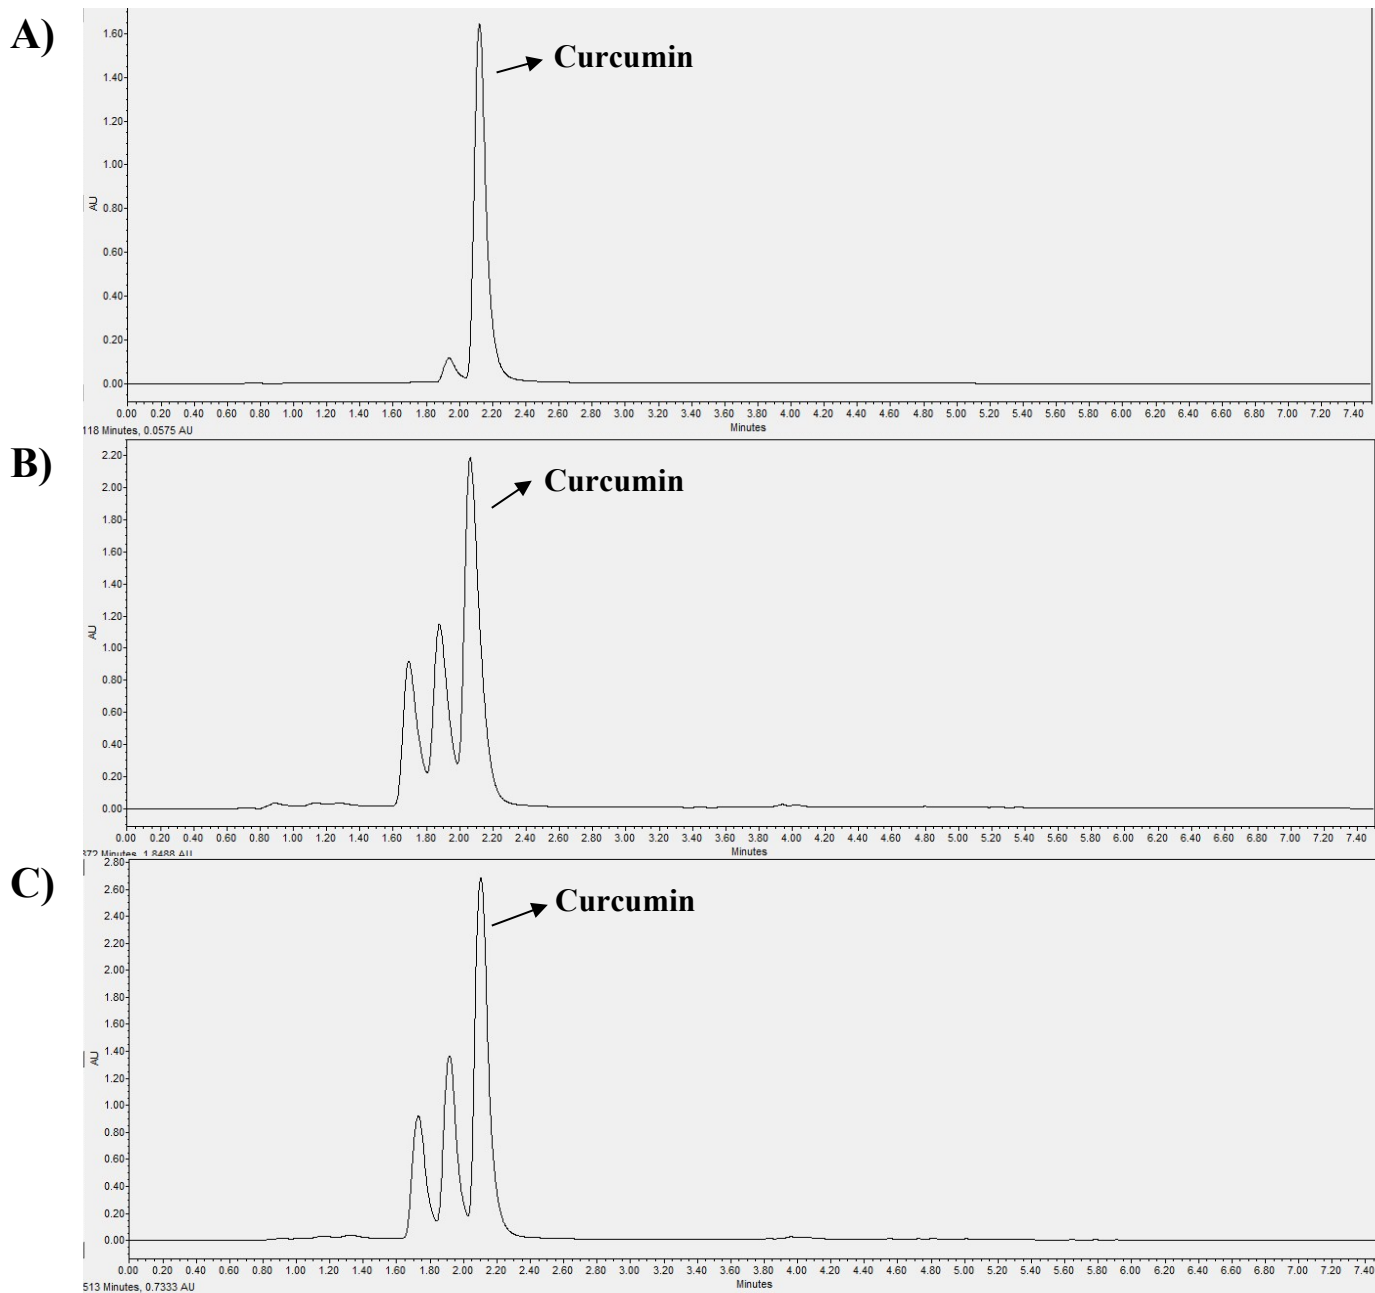

**Supplementary Figure 1.** HPLC/DAD chromatograms obtained for curcumin analysis of turmeric extracts: A) Curcumin standard; B) PLE extract chromatogram; C) HIUS extract chromatogram.
